# Supplementary material for: Antibiotic-Resistant Bacteria Dissemination in the Wildlife, Livestock, and Water of Maiella National Park, Italy
Source: MDPI journal article supplement (doi:10.3390/ani13030432), 2023-01-27
Supplement: s1 [file s1]

**Supplementary Table S1.** Details of oligonucleotides and PCR protocols used for the detection of antimicrobial resistance genes.

| Primer      | Sequence 5'- 3'                | Size (bp) | References            |
|-------------|--------------------------------|-----------|-----------------------|
| Mcr-1 Fw    | AGTCCGTTTGTCTTGTGGC            | 320       | Rebelo et al. 2018    |
| Mcr-1 Rev   | AGATCCTTGGTCTCGGCTTG           |           |                       |
| Mcr-2 Fw    | CAAGTGTGTTGGTCGCAGTT           | 715       |                       |
| Mcr-2 Rev   | TCTAGCCCGACAAGCATACC           |           |                       |
| Mcr-5Fw     | ATGCGGTTGTCTGCATTTATC          | 207       | Jousset et al. 2019   |
| Mcr-5 Rev   | TCATTGTGGTTGTCTTTTCTG          |           |                       |
| Mcr-4 Fw    | ATTGGGATAGTCGCCTTTTT           | 487       | Carattoli et al. 2013 |
| Mcr-4 Rev   | TTACAGCCAGAATCATTATCA          |           |                       |
| Mcr-3 Fw    | AAATAAAAATTGTTCCGCTTATG        | 542       | Yin et al. 2017       |
| Mcr-3 Rev   | AATGGAGATCCCCGTTTTT            |           |                       |
| blaTEM F    | CCGTGTCGCCCTTATTCCC            | 780       | Kikuvu et al. 2010    |
| blaTEM R    | GCCTGACTCCCCGTCGTGT            |           |                       |
| IMP-F       | GGAATAGAGTGGCTTAAYTCTC         | 232       | Hatrongit et al. 2018 |
| IMP-R       | GGTTTAAYAAAACAACCACC           |           |                       |
| OXA-48F     | GCGTGGTTAAGGATGAACAC           | 438       |                       |
| OXA-48R     | CATCAAGTTCAACCCAACCG           |           |                       |
| NDM-F       | GGTTTGGCGATCTGGTTTTTC          | 621       |                       |
| NDM-R       | CGGAATGGCTCATCACGATC           |           |                       |
| KPC-F       | CGTCTAGTTCTGCTGTCTTG           | 790       |                       |
| KPC-R       | CTTGTCATCCTTGTTAGGCG           |           |                       |
| blaCTX-M F  | ATGTGCAGYACCAGTAARGTKATGGC     | 593       | Hasman et a. 2005     |
| blaCTX-M R  | TGGGTRAARTARGTSACCAGAAAYCAGCGG |           |                       |
| blaCMY-2 F  | GCACTTAGCCACCTATACGGCAG        | 758       |                       |
| blaCMY-2 R  | GCTTTTCAAGAATGCGCCAGG          |           |                       |
| blaSHV F    | TTATCTCCCTGTTAGCCACC           | 797       | Arlet et al. 1997     |
| blaSHV R    | GATTTGCTGATTCGCTCGG            |           |                       |
| blaCMY-1 F  | ATGCAACAACGACAATCC             | 1085      | Kim et al. 1998       |
| blaCMY-1 R  | TTGGCCAGCATGACGATG             |           |                       |
| Tet (A) Fw  | GTAATTCTGAGCACTGT              | 954       | Kikuvu et al. 2010    |
| Tet (A) Rev | CCTGGACAACATTGCTT              |           |                       |
| Tet (B) Fw  | ACGTTACTCGATGCCAT              | 1170      |                       |
| Tet (B) Rev | AGCACTTGTCCTCTGTT              |           |                       |
| Tet C Fw    | AACAATGCGCTCATCGT              | 1138      | Trzcinski et al. 2000 |
| Tet C Rev   | GGAGGCAGACAAGGTAT              |           |                       |
| Tet(L) Fw   | ATAAATTGTTTCGGGTCGGTAAT        | 1077      |                       |
| Tet(L) Rev  | AACCAGCCAACTAATGACAATGAT       |           |                       |
| Tet(M) Fw   | ACAGAAAGCTTATTATATAAC          | 171       | Aminov et al. 2001    |
| Tet(M)Rev   | TGGCGTGTCTATGATGTTAC           |           |                       |

|            |                           |     |                        |
|------------|---------------------------|-----|------------------------|
| Tet(K) Fw  | TTATGGTGGTTGTAGCTAGAAA    | 382 | Gevers et al. 2003     |
| Tet(K) Rev | AAAGGGTTAGAACTCTTGAAA     |     |                        |
| VanD_F1    | TGGAATCACAAAATCCGGCG      | 311 | Nomura et al. 2018     |
| VanD_R2    | TWCCCGCATTTTTTCACAACS     |     |                        |
| VanM_F1    | GGCAGAGATTGCCAACAACA      | 425 |                        |
| VanM_R1    | AGGTAAACGAATCTGCCGCT      |     |                        |
| VanC2_F1   | GCAAACGTTGGTACCTGATG      | 523 |                        |
| VanC2_R4   | GGTGATTTTGGCGCTGATCA      |     |                        |
| VanB_F1    | GATGTGTCGGTAAAATCCGC      | 640 |                        |
| VanB_R1    | CCACTTCGCCGACAATCAAA      |     |                        |
| VanA_F1    | GCAAGTCAGGTGAAGATGGA      | 721 |                        |
| VanA_R1    | GCTAATACGATCAAGCGGTC      |     |                        |
| VanC1_5    | GTATCAAGGAAACCTCGCGA      | 836 |                        |
| VanC1_6    | CGTAGGATAACCCGACTTCC      |     |                        |
| VanN_F1    | CCTCAAATCAGCAGCTAGTG      | 941 |                        |
| VanN_R1    | GCTCCTGATAAGTGATACCC      |     |                        |
| vanG FW    | CGGTTGTGCCGTACTTGGC       | 810 | McKessar et al., 2000  |
| vanG REV   | GGGTAAAGCCATAGTCTGGGGC    |     |                        |
| Cfr_fw     | TGAAGTATAAAGCAGGTTGGGAGTC | 746 | Bender et al. 2019     |
| Cfr_rev    | AACCATATAATTGACCACAAGCAGC |     |                        |
| optrA_fw   | TACTTGATGAACCTACTAACCA    | 422 |                        |
| optrA_rev  | CCTTGAAGTACTGATTCTCGG     |     |                        |
| poxA fw    | AAAGCTACCCATAAAATATC      | 533 |                        |
| poxA rev   | TCATCAAGCTGTTCGAGTTC      |     |                        |
| cfr(B) fw  | TGAGCATATACGAGTAACCTCAAGA | 293 | Lee et al. 2017        |
| cfr(B) rev | CGCAAGCAGCGTCTATATCA      |     |                        |
| cfr(D) fw  | AGAAGTCGCAACAAGTGAGGA     | 595 | Ruiz-Ripa et al., 2020 |
| cfr(D) rev | GCAACTGCATGAGTCAAAGAA     |     |                        |
| Vat D F    | TCCAGCTAACATGTATGGCG      | 271 | Shaw et al., 2018      |
| Vat D R    | GCTCAATAGGACCAGGTGTA      |     |                        |
| vgaA F     | AGTGGTGGTGAAGTAACACG      | 659 |                        |
| vgaA R     | CTTGCTCTCCTCCGGAATAC      |     |                        |
| vgaB F     | TGACAATATGAGTGGTGGTG      | 576 |                        |
| vgaB R     | GCGACCATGAAATTGCTCTC      |     |                        |
| vgbB F     | CAGCAGTCTAGATCAGAGTGG     | 728 |                        |
| vgbB R     | CATACGGATCCATCTTTTCC      |     |                        |
| msrC F     | AAGGAATCCTTCTCTCTCCG      | 343 |                        |
| msrC R     | GTAAACAAAATCGTTCCCG       |     |                        |
| vgbA F     | TACAGAGTACCCACTACCGA      | 569 |                        |
| vgbA R     | TCAATTCTGCTCCAGCAGT       |     |                        |
| ermB F     | CATTTAACGACGAACTGGC       | 424 |                        |
| ermB R     | GGAACATCTGTGGTATGGCG      |     |                        |

|            |                           |      |                        |
|------------|---------------------------|------|------------------------|
| vatE F     | ACTATACCTGACGCAAATGC      | 511  |                        |
| vatE R     | GGTTCAAATCTTGGTCCG        |      |                        |
| ermTR FW   | GCTATAGAGATTGATGAAGG      | 152  | Davignon et al., 2000  |
| ermTR REV  | CTAATATTGTAGGGAATATTACC   |      |                        |
| ermA FW    | AAG CGGTAAAACCCCTCTGAG    | 421  |                        |
| ermA FW    | TCAAAGCCTGTCGGAATTGG      |      | Jensen et al., 1999    |
| ermC FW    | CAAACCCGTATTCCACGATT      | 294  |                        |
| ermC REV   | ATCTTTGAAATCGGCTCAGG      |      |                        |
| Pbp1FW     | AAACAAGGTCGGACTCAACC      | 195  |                        |
| Pbp1 REV   | ATATACATTGGTTTATAGTAAGTT  |      |                        |
| Pbp2x FW   | CCAGGTCCACTATGAAAGTG      | 197  | Nagai et al., 2001     |
| Pbp2x REV  | ATCCCAACGTTACTTGAGTGT     |      |                        |
| Pbp2b FW   | CCTATATGGTCCAAACAGCCT     | 147  |                        |
| Pbp2b REV  | GGTCAATTCCTGTCGCAGTA      |      |                        |
| gyrA FW    | AAATCTGCTCGTGTCGTTGG      | 349  | Ardebili et al., 2015  |
| gyrA REV   | GCCATACCTACAGCAATACC      |      |                        |
| mefA/E FW  | AGTATCATTAATCACTAGTGC     | 348  | Sutcliffe et al., 1996 |
| mefA/E REV | TTCTTCTGGTACTAAAAGTGG     |      |                        |
| Sul1 FW    | TGGTGACGGTGTTCCGGCATTC    | 789  |                        |
| Sul1 REV   | GCGAGGGTTTCCGAGAAGGTG     |      |                        |
| Sul2 FW    | CGGCATCGTCAACATAACC       | 722  | Turchi et al., 2019    |
| Sul2 REV   | GTGTGCGGATGAAAGTCAG       |      |                        |
| Sul3 FW    | GAGCAAGATTTTTGGAATCG      | 792  |                        |
| Sul3 REV   | CATCTGCAGCTAACCTAGGGTTTGA |      |                        |
| aacC1 FW   | GCAGTCGCCCTAAAACAAA       | 441  | Ghotaslou et al., 2017 |
| aacC1 REV  | CACCTTCTTCCCGTATGCCCAACTT |      |                        |
| aac3 FW    | ATATCGCGATGCATACGCGG      | 877  |                        |
| aac3 REV   | GACGGCCTCTAACCGBAAGG      |      |                        |
| armA FW    | CCGAAATGACAGTTCCTATC      | 846  | Hu et al., 2013        |
| armA REV   | GAAAATGAGTGCCTTGGAGG      |      |                        |
| rmtB FW    | ATGAACATCAACGATGCCCTC     | 769  |                        |
| rmtB REV   | CCTTCTGATTGGCTTATCCA      |      |                        |
| aacA4 FW   | GCTCTTGGAAGCGGGGACGG      | 300  | Sacha et al., 2012     |
| aacA4 REV  | TCGCTCGAATGCCTGGCGTG      |      |                        |
| aphA6 FW   | CATTTGCGGGTTTTTAATG       | 837  | Aris et al., 2019      |
| aphA6 REV  | TTAGATAATGCTTGGAAATCA     |      |                        |
| rmtC FW    | CGAAGAAGTAACAGCCAAAG      | 1000 |                        |
| rmtC REV   | GCTAGAGTCAAGCCAGAAAA      |      | Wangkheimayum et al.,  |
| rmtF FW    | GCGATACAGAAAACCGAAGG      | 589  | 2020                   |
| rmtF REV   | ACCAGTCGGCATAGTGCTTT      |      |                        |

**Supplementary Table S2.** Table summarizes the resistant bacteria isolated from environmental and fecal samples of wild and domestic animals.

| AB          | Number of resistant isolates   |                                     |                                    |                                         |                                       |                                 |                               |                                           |                            |                            |                                  |                          |                                |                          |
|-------------|--------------------------------|-------------------------------------|------------------------------------|-----------------------------------------|---------------------------------------|---------------------------------|-------------------------------|-------------------------------------------|----------------------------|----------------------------|----------------------------------|--------------------------|--------------------------------|--------------------------|
|             | <i>Escherichia coli</i> (n=40) | <i>Enterococcus faecalis</i> (n=11) | <i>Enterococcus faecium</i> (n=12) | <i>Enterococcus casseliflavus</i> (n=4) | <i>Enterococcus gallinarum</i> (n=15) | <i>Enterococcus hirae</i> (n=6) | <i>Aeromonas sobria</i> (n=1) | <i>Enterobacter cloacae</i> complex (n=2) | <i>Ps. mendocina</i> (n=2) | <i>Morg. morgani</i> (n=1) | <i>Str. allactolyticus</i> (n=1) | <i>Str. mutans</i> (n=1) | <i>Str. thoraltensis</i> (n=1) | <i>Str. uberis</i> (n=1) |
| AMP         | 3(7.5%)                        | 0                                   | 0                                  | 0                                       | 0                                     | 0                               | 0                             | 0                                         | 0                          | 0                          | 0                                | 1                        | 0                              | 1                        |
| TZP/<br>TAZ | 0                              | -                                   | -                                  | -                                       | -                                     | -                               | 1                             | 1                                         | 0                          | 0                          | -                                | -                        | -                              | -                        |
| BEN         | -                              | -                                   | -                                  | -                                       | -                                     | -                               | -                             | -                                         | -                          | -                          | 0                                | 1                        | 0                              | 1                        |
| CTZ         | 1(2.5%)                        | -                                   | -                                  | -                                       | -                                     | -                               | 0                             | 1                                         | 1                          | 0                          | -                                | -                        | -                              | -                        |
| CTX         | 0                              | -                                   | -                                  | -                                       | -                                     | -                               | 0                             | 1                                         | 1                          | 0                          | 1                                | 1                        | 1                              | 1                        |
| CRO         | -                              | -                                   | -                                  | -                                       | -                                     | -                               | -                             | -                                         | -                          | -                          | 1                                | 1                        | 1                              | 1                        |

|      |         |   |   |   |   |   |   |   |   |   |   |   |   |   |
|------|---------|---|---|---|---|---|---|---|---|---|---|---|---|---|
| ETP  | 0       | - | - | - | - | - | 0 | 0 | 2 | 0 | - | - | - | - |
| MRP  | 1(2.5%) | - | - | - | - | - | 0 | 2 | 0 | 0 | - | - | - | - |
| AMK  | 0       | - | - | - | - | - | 0 | 0 | 0 | 0 | - | - | - | - |
| CLIN | -       | - | - | - | - | - | - | - | - | - | 1 | 1 | 1 | 1 |
| ERY  | -       | - | - | - | - | - | - | - | - | - | - | - | 1 | 1 |
| GEN  | 0       | 0 | 0 | 0 | 0 | 0 | 0 | 0 | 0 | 0 | 0 | 0 | 0 | 0 |
| KAN  | -       | 0 | 0 | 0 | 0 | 0 | 0 | 0 | 0 | 0 | - | - | - | - |
| STM  | -       | 0 | 0 | 0 | 0 | - | 0 | 0 | 0 | 0 | - | - | - | - |

|      |         |   |        |   |        |   |   |   |   |   |   |   |   |   |   |
|------|---------|---|--------|---|--------|---|---|---|---|---|---|---|---|---|---|
| CPFX | 0       | 0 | 0      | 0 | 0      | 0 | 0 | 0 | 0 | 0 | 0 | - | - | - | - |
| TGC  | 0       | 0 | 0      | 0 | 0      | 0 | 0 | 0 | 0 | 0 | 1 | 0 | 1 | 0 | 1 |
| NIT  | 0       | 0 | 0      | 0 | 0      | 0 | 0 | 0 | 0 | 0 | 1 | - | - | - | - |
| CS   | 10(25%) | - | -      | - | -      | - | 0 | 0 | 0 | 0 | 0 | - | - | - | - |
| TET  | 6(15%)  | 0 | -1(9%) | 0 | 3(20%) | 0 | 0 | 0 | 0 | 0 | 0 | 0 | 0 | 0 | 0 |
| SXT  | 2(5%)   | - | -      | - | -      | - | 0 | 0 | 0 | 0 | 0 | 0 | 0 | 0 | 0 |
| LVX  | -       | 0 | 0      | 0 | 0      | 0 | - | - | - | - | - | 0 | 0 | 0 | 0 |
| LIN  | -       | 0 | 1(9%)  | 0 | 6(40%) | 0 | - | - | - | - | - | 0 | 1 | 0 | 1 |

|     |   |       |       |   |        |   |   |   |   |   |   |   |   |   |
|-----|---|-------|-------|---|--------|---|---|---|---|---|---|---|---|---|
| DAP | - | 0     | 0     | 0 | 0      | 0 | - | - | - | - | - | - | - | - |
| TEC | - | 1(9%) | 0     | 0 | 0      | 0 | - | - | - | - | 0 | 0 | 0 | 0 |
| VAN | - | 0     | 1(9%) | 0 | 0      | 0 | - | - | - | - | 0 | 1 | 1 | 0 |
| QD  | - | 0     | 1(9%) | 0 | 7(46%) | 0 | - | - | - | - | - | - | - | - |

AMP Ampicillin; AK Amikacin; BEN Benzypenicillin; CS colistin; CLIN Clindamycin; CTX Cefotaxime; CRO Ceftriaxone; ERY Erythromycin; ETP Ertapenem; MER Meropenem; NIT nitrofurantoin; QD quinupristin/dalfopristin; SXT Trimethoprim/sulfamethoxazole; TEIC Teicoplanin; TET Tetracycline; TGC Tigecycline; TZP/TAZ Piperacillin/tazobactam; VAN Vancomycin.
